# Supplementary material
Source: Springer Nature journal article supplement (https://www.springermedizin.de/resource/supplementary/13256_2009_1227_MOESM2_ESM.pdf/9647288)

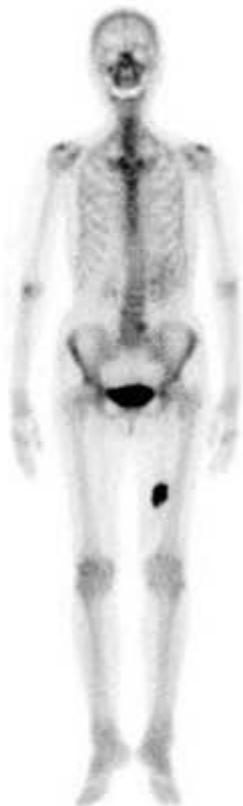

L  
o  
f  
t

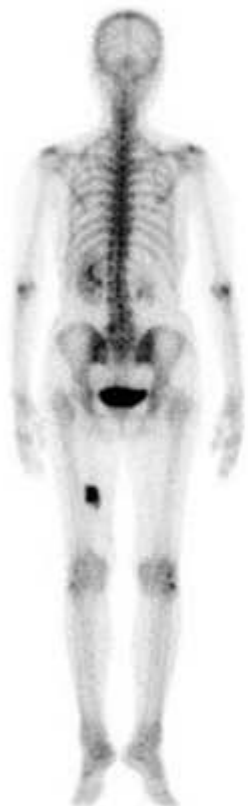

Supplement: MOESM2 [file 9647288]
